# Supplementary material for: Classification of the Gut Microbiota of Patients in Intensive Care Units During Development of Sepsis and Septic Shock
Source: PubMed Central journal article supplement (PMC8377022; doi:10.1016/j.gpb.2020.06.011), 2021-02-17

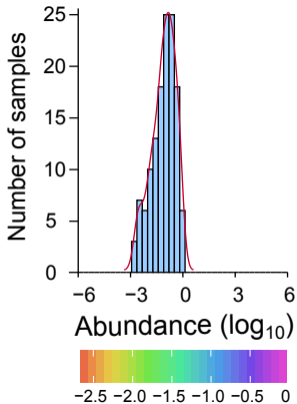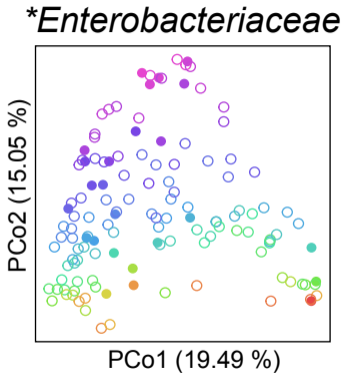

Supplement: mmc2.pdf [file mmc2.pdf]
