# Supplementary material for: Classification of the Gut Microbiota of Patients in Intensive Care Units During Development of Sepsis and Septic Shock
Source: PubMed Central journal article supplement (PMC8377022; doi:10.1016/j.gpb.2020.06.011), 2021-02-17

**A** Distribution of antibiotic use before ICU admission

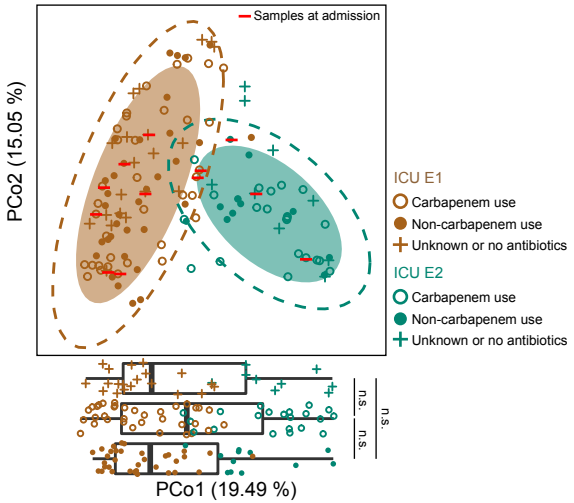

**B** Distribution of antibiotic use after ICU admission

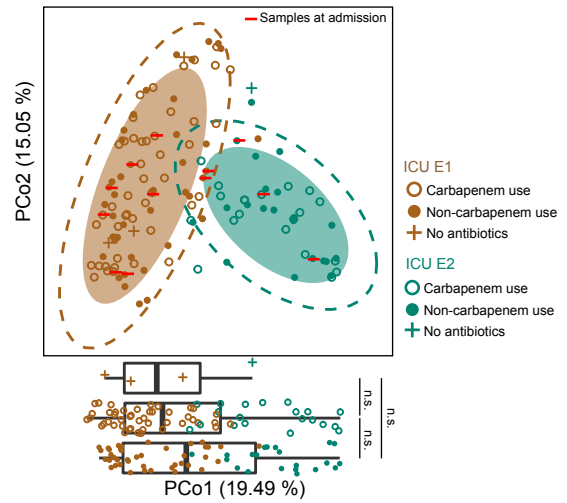

**C** Distribution of infection sites of samples

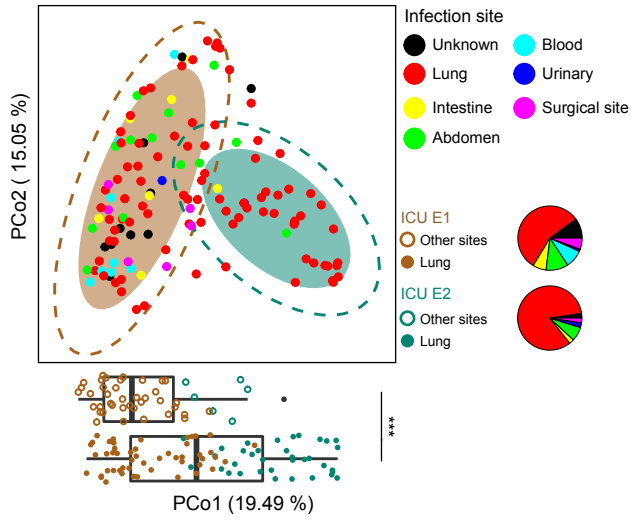

Supplement: mmc3.pdf [file mmc3.pdf]
